# Supplementary material
Source: PubMed Central journal article supplement (PMC4715215)

**Figure Sup 1**

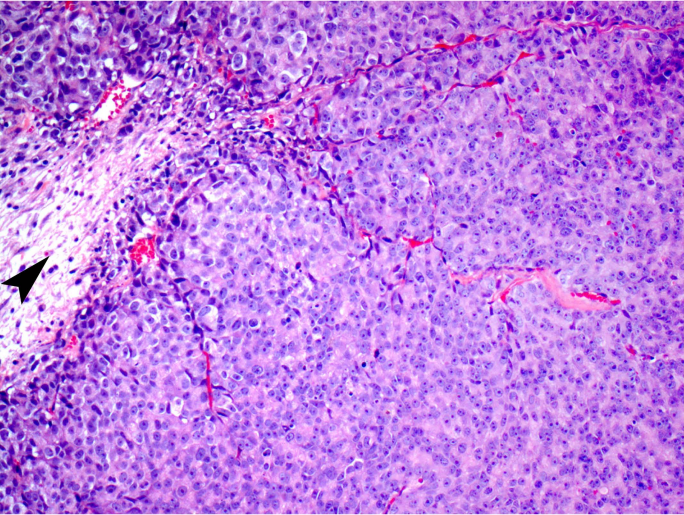

Supplement: mmc1.pdf [file mmc1.pdf]

**Figure Sup 2**

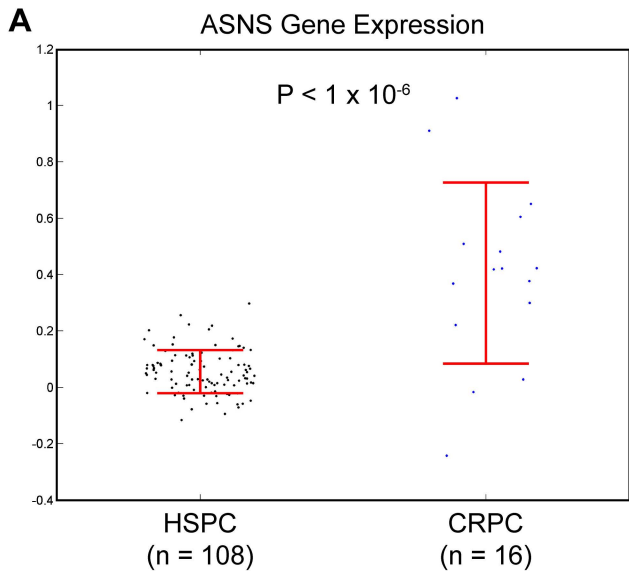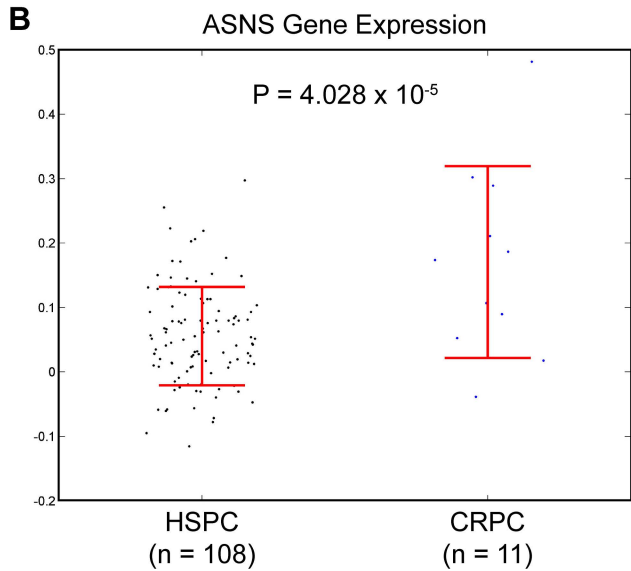

Supplement: mmc2.pdf [file mmc2.pdf]
